# Supplementary material for: Leadership and management influences the outcome of wildlife reintroduction programs: findings from the Sea Eagle Recovery Project
Source: PeerJ. 2015 Jun 18;3:e1012. doi: 10.7717/peerj.1012 (PMC4476100; doi:10.7717/peerj.1012)
Supplement: Supplemental Information 2 [file peerj-03-1012-s002.xlsx]

## Sheet: All Queries
	Classification Name:Pilot Phase (1968) = Yes	Classification Name:Phase 1 (1975 - 1985) = Yes	Classification Name:Phase 2 (1993 - 1998) = Yes	Classification Name:Phase 3 (2007 - 2012) = Yes
1 : Growth and Change	9	10	25	26		2.25	2.5	3.57143	3.71429
2 : Evaluation	7	11	23	26		1.75	2.75	3.28571	3.71429
3 : Externally Undertaken	0	0	0	0		0	0	0	0
4 : Formal	2	3	10	12		0.5	0.75	1.42857	1.71429
5 : Informal	1	1	3	3		0.25	0.25	0.428571	0.428571
6 : Internally Undertaken	1	1	4	4		0.25	0.25	0.571429	0.571429
7 : Ongoing Evaluation	1	2	7	10		0.25	0.5	1	1.42857
8 : Periodic Evaluation	2	2	3	3		0.5	0.5	0.428571	0.428571
9 : Mistakes	6	6	11	11		1.5	1.5	1.57143	1.57143
10 : Needs and Challenges	3	4	5	5		0.75	1	0.714286	0.714286
11 : Progress	4	5	14	14		1	1.25	2	2
12 : Fair	1	2	2	2		0.25	0.5	0.285714	0.285714
13 : Good	0	0	2	3		0	0	0.285714	0.428571
14 : Slow, Poor	3	3	9	8		0.75	0.75	1.28571	1.14286
15 : Public Relations	13	13	26	31		3.25	3.25	3.71429	4.42857
16 : Conflict and Persecution	13	14	38	37		3.25	3.5	5.42857	5.28571
17 : Tourism	1	1	6	4		0.25	0.25	0.857143	0.571429
18 : Transparency	1	1	1	1		0.25	0.25	0.142857	0.142857
19 : Concealed Site or Facts	1	1	6	6		0.25	0.25	0.857143	0.857143
20 : Structure and Hierarchy	9	13	33	33		2.25	3.25	4.71429	4.71429
21 : Coworkers	5	5	6	6		1.25	1.25	0.857143	0.857143
22 : Shared Tasks	0	1	1	0		0	0.25	0.142857	0
23 : Supervised Help	1	1	8	7		0.25	0.25	1.14286	1
24 : Task Division	6	7	16	15		1.5	1.75	2.28571	2.14286
25 : Volunteer Help	2	2	7	6		0.5	0.5	1	0.857143
26 : Autonomous	7	8	10	10		1.75	2	1.42857	1.42857
27 : Jack-of-All-Trades	1	2	4	3		0.25	0.5	0.571429	0.428571
28 : Non-Autonomous	0	0	0	0		0	0	0	0
29 : Sole Service	5	7	11	10		1.25	1.75	1.57143	1.42857
30 : Hierarchical	6	6	13	13		1.5	1.5	1.85714	1.85714
31 : Non-Hierarchical	7	8	7	7		1.75	2	1	1
32 : Long-Term Goals	4	7	23	28		1	1.75	3.28571	4
33 : Familiar With	0	0	3	4		0	0	0.428571	0.571429
34 : Formally Set	1	3	10	13		0.25	0.75	1.42857	1.85714
35 : Frequently Set	0	0	0	0		0	0	0	0
36 : Informally Set	0	0	1	1		0	0	0.142857	0.142857
37 : Infrequently Set	2	2	2	2		0.5	0.5	0.285714	0.285714
38 : Ongoing Determination	3	3	9	8		0.75	0.75	1.28571	1.14286
39 : Unfamiliar With	0	1	2	0		0	0.25	0.285714	0
40 : Widely Known	1	1	2	4		0.25	0.25	0.285714	0.571429
41 : Few, Permissive	1	1	1	1		0.25	0.25	0.142857	0.142857
42 : Many, Restrictive	1	1	1	1		0.25	0.25	0.142857	0.142857
43 : Short-Term Goals	2	3	13	13		0.5	0.75	1.85714	1.85714
44 : Familiar With	1	1	2	2		0.25	0.25	0.285714	0.285714
45 : Formally Set	0	0	1	1		0	0	0.142857	0.142857
46 : Frequently Set	0	1	4	4		0	0.25	0.571429	0.571429
47 : Informally Set	2	3	8	10		0.5	0.75	1.14286	1.42857
48 : Infrequently Set	1	1	1	1		0.25	0.25	0.142857	0.142857
49 : Ongoing Determination	1	1	2	2		0.25	0.25	0.285714	0.285714
50 : Unfamiliar With	0	0	1	2		0	0	0.142857	0.285714
51 : Widely Known	0	0	0	0		0	0	0	0

## Sheet: Nature of Work in the SERP
	Classification Name:Pilot Phase (1968) = Yes	Classification Name:Phase 1 (1975 - 1985) = Yes	Classification Name:Phase 2 (1993 - 1998) = Yes	Classification Name:Phase 3 (2007 - 2012) = Yes
1 : Shared Tasks	0	1	1	0
2 : Task Division	6	7	16	15
3 : Autonomous	7	8	10	10
4 : Jack-of-All-Trades	1	2	4	3
5 : Sole Service	5	7	11	10
6 : Hierarchical	6	6	13	13
7 : Non-Hierarchical	7	8	7	7
	Pilot Phase (1968)	Phase 1 (1975 - 1985)	Phase 2 (1993 - 1998)	Phase 3 (2007 - 2012)
1: Shared Tasks	0	0.25	0.142857	0	0.0982143
2 : Task Division	1.5	1.75	2.28571	2.14286	1.91964
3 : Autonomous	1.75	2	1.42857	1.42857	1.65179
4 : Jack-of-All-Trades	0.25	0.5	0.571429	0.428571	0.4375
5 : Solo Service	1.25	1.75	1.57143	1.42857	1.5
6 : Hierarchical	1.5	1.5	1.85714	1.85714	1.67857

## Sheet: Nature of Goals & Targets
	Classification Name:Pilot Phase (1968) = Yes	Classification Name:Phase 1 (1975 - 1985) = Yes	Classification Name:Phase 2 (1993 - 1998) = Yes	Classification Name:Phase 3 (2007 - 2012) = Yes
1 : Formally Set	1	7	10	13
2 : Frequently Set	0	0	0	0
3 : Informally Set	0	0	1	1
4 : Infrequently Set	2	2	2	2
5 : Ongoing Determination	3	3	9	8
6 : Few, Permissive	1	1	1	1
7 : Many, Restrictive	1	1	2	2
8 : Formally Set	0	0	1	1
9 : Frequently Set	0	2	4	4
10 : Informally Set	2	4	8	10
11 : Infrequently Set	1	1	1	1
12 : Ongoing Determination	1	1	2	2
	Pilot Phase (1968)	Phase 1 (1975 - 1985)	Phase 2 (1993 - 1998)	Phase 3 (2007 - 2012)
1 : Formally Set	0.25	1.75	1	1.3
3 : Informally Set	0.25	1.75	1	1.3
2 : Frequently Set	0	0	0	0
4 : Infrequently Set	0.5	0.5	0.2	0.2
5 : Ongoing Determination	0.75	0.75	0.9	0.8
6 : Few, Permissive	0.25	0.25	0.1	0.1
7 : Many, Restrictive	0.25	0.25	0.2	0.2
8 : Formally Set	0	0	0.1	0.1
9 : Frequently Set	0	0.5	0.4	0.4
10 : Informally Set	0.5	1	0.8	1
11 : Infrequently Set	0.25	0.25	0.1	0.1
12 : Ongoing Determination	0.25	0.25	0.2	0.2

## Sheet: Nature of Evaluation in the SER
	Classification Name:Pilot Phase (1968) = Yes	Classification Name:Phase 1 (1975 - 1985) = Yes	Classification Name:Phase 2 (1993 - 1998) = Yes	Classification Name:Phase 3 (2007 - 2012) = Yes
1 : Externally Undertaken	0	0	2	2
2 : Formal	2	5	10	12
3 : Informal	1	1	3	3
4 : Internally Undertaken	1	1	5	5
5 : Ongoing Evaluation	1	3	7	10
6 : Periodic Evaluation	2	2	5	5
	Pilot Phase (1968)	Phase 1 (1975 - 1985)	Phase 2 (1993 - 1998)	Phase 3 (2007 - 2012)
1 : Externally Undertaken	0	0	0.2	0.2
2 : Formal	0.5	1.25	1	1.2
3 : Informal	0.25	0.25	0.3	0.3
5 : Ongoing Evaluation	0.25	0.75	0.7	1
6 : Periodic Evaluation	0.5	0.5	0.5	0.5
